# Supplementary material for: A Necroptosis-Related lncRNA to Develop a Signature to Predict the Outcome, Immune Landscape, and Chemotherapeutic Responses in Bladder Urothelial Carcinoma
Source: Front Oncol. 2022 Jun 24;12:928204. doi: 10.3389/fonc.2022.928204 (PMC9270023; doi:10.3389/fonc.2022.928204)
Supplement: Supplementary Table 3 — A list of necroptosis-related lncRNAs in BLCA. [file Table_3.xlsx]

## Sheet: Sheet1
Necroptosis-related genes	Necroptosis-related lncRNAs	Correlation coefficient	P-value	Regulation
TSC1	LINC01355	0.576064	1.28278e-37	postive
BRAF	LINC01355	0.6593	1.75594e-52	postive
CDKN2A	AC010442.1	0.513815	5.309e-29	postive
TRIM11	AP002761.1	0.503897	8.71189e-28	postive
OTULIN	DLEU1	0.516691	2.31805e-29	postive
BRAF	DLEU1	0.791005	4.33669e-89	postive
ATRX	DLEU1	0.586131	3.43166e-39	postive
BRAF	AC008035.1	0.627842	2.47848e-46	postive
CD40	PCED1B-AS1	0.546626	2.55805e-33	postive
TSC1	AL138756.1	0.60158	1.02981e-41	postive
BRAF	AL138756.1	0.677471	2.19711e-56	postive
ATRX	AC073569.2	0.503964	8.55129e-28	postive
TSC1	AC002128.1	0.595141	1.20463e-40	postive
BRAF	AC002128.1	0.739383	4.28314e-72	postive
ATRX	AC002128.1	0.53371	1.45838e-31	postive
TSC1	SLC25A25-AS1	0.634089	1.69585e-47	postive
ATRX	HIF1A-AS3	0.547657	1.83844e-33	postive
BRAF	AC073534.2	0.758658	6.16143e-78	postive
OTULIN	AL133243.2	0.514436	4.44148e-29	postive
BRAF	AL133243.2	0.60614	1.74422e-42	postive
ATRX	AL133243.2	0.633709	2.00068e-47	postive
BRAF	AC025171.4	0.628924	1.56465e-46	postive
BRAF	AC027117.1	0.722358	2.38121e-67	postive
BRAF	SP2-AS1	0.776256	8.9944e-84	postive
ATRX	SP2-AS1	0.564064	8.18328e-36	postive
BRAF	ALG13-AS1	0.685603	3.18311e-58	postive
ATRX	ALG13-AS1	0.722553	2.11015e-67	postive
TSC1	AC127024.4	0.527547	9.44935e-31	postive
BRAF	AC127024.4	0.610564	3.02946e-43	postive
ATRX	AC127024.4	0.65661	6.30037e-52	postive
TRIM11	AL121790.2	0.512904	6.89035e-29	postive
TSC1	AC006042.1	0.530305	4.11395e-31	postive
BRAF	ERVK13-1	0.570886	7.86988e-37	postive
OTULIN	AC006270.1	0.502861	1.16075e-27	postive
BRAF	AC006270.1	0.826225	9.84057e-104	postive
ATRX	AC006270.1	0.530154	4.30673e-31	postive
BRAF	CASC22	0.508421	2.45927e-28	postive
BRAF	AL359715.1	0.522813	3.86935e-30	postive
BRAF	NDUFB2-AS1	0.665055	1.09168e-53	postive
IDH1	LINC00885	0.522176	4.66891e-30	postive
ATRX	AL512791.1	0.515164	3.60286e-29	postive
TRAF2	ARRDC1-AS1	0.502252	1.37332e-27	postive
ATRX	C1RL-AS1	0.520079	8.64565e-30	postive
FAS	AL157394.1	0.786163	2.68511e-87	postive
BRAF	AC004918.5	0.661397	6.42846e-53	postive
ATRX	AC004918.5	0.652423	4.48187e-51	postive
BRAF	AC023510.2	0.765392	4.14137e-80	postive
ATRX	AC023510.2	0.51426	4.67286e-29	postive
LEF1	LINC02178	0.510006	1.57158e-28	postive
TSC1	AC010761.3	0.516247	2.63596e-29	postive
BRAF	AC010761.3	0.708113	1.2086e-63	postive
ATRX	AC010761.3	0.685102	4.14818e-58	postive
TSC1	AL158212.3	0.562269	1.5017e-35	postive
BRAF	AL158212.3	0.517548	1.80828e-29	postive
ATRX	AL158212.3	0.545404	3.77917e-33	postive
KLF9	AP003071.4	0.589545	9.76622e-40	postive
ATRX	OIP5-AS1	0.634578	1.37145e-47	postive
ATRX	AL049840.4	0.650577	1.05453e-50	postive
TSC1	PSMA3-AS1	0.528788	6.50674e-31	postive
TSC1	AC090589.3	0.604917	2.81535e-42	postive
BRAF	AC145423.3	0.565216	5.53245e-36	postive
BRAF	NARF-IT1	0.594804	1.36786e-40	postive
ATRX	NARF-IT1	0.513991	5.0471e-29	postive
TSC1	GARS1-DT	0.563965	8.46239e-36	postive
BRAF	GARS1-DT	0.698125	3.5468e-61	postive
ATRX	GARS1-DT	0.550446	7.47873e-34	postive
ATRX	AC005046.2	0.564554	6.92957e-36	postive
TSC1	AC129510.1	0.54035	1.86508e-32	postive
BRAF	AC129510.1	0.543746	6.39933e-33	postive
ATRX	AC129510.1	0.576152	1.24319e-37	postive
TNFRSF1B	LINC01943	0.615085	4.92003e-44	postive
BRAF	AC000123.1	0.749829	3.40425e-75	postive
ATRX	AC000123.1	0.605836	1.96518e-42	postive
BRAF	AC092794.1	0.684247	6.50994e-58	postive
ATRX	AC092794.1	0.570293	9.66844e-37	postive
TSC1	PSPC1-AS2	0.509108	2.02597e-28	postive
BRAF	PSPC1-AS2	0.694302	2.93495e-60	postive
ATRX	PSPC1-AS2	0.522309	4.49013e-30	postive
TSC1	ZNF436-AS1	0.590856	6.00366e-40	postive
BRAF	ZNF436-AS1	0.642915	3.44877e-49	postive
BRAF	AL591806.1	0.562286	1.49347e-35	postive
TSC1	ZNF32-AS2	0.503757	9.05678e-28	postive
BRAF	MAP3K5-AS1	0.706593	2.91512e-63	postive
ATRX	MAP3K5-AS1	0.515622	3.1574e-29	postive
BRAF	AC005332.3	0.551959	4.57547e-34	postive
KLF9	AL139393.3	0.616678	2.57532e-44	postive
BRAF	AC132807.2	0.51705	2.08888e-29	postive
BRAF	AC097641.2	0.722987	1.61377e-67	postive
ATRX	AC097641.2	0.504799	6.77933e-28	postive
ATRX	AL359921.1	0.537223	4.94126e-32	postive
KLF9	AL136084.3	0.565142	5.67286e-36	postive
MAP3K7	AL513550.1	0.530957	3.37689e-31	postive
BRAF	AL513550.1	0.515998	2.83248e-29	postive
ATRX	AL513550.1	0.593488	2.24493e-40	postive
BRAF	AC005104.1	0.645518	1.06658e-49	postive
ATRX	AC005104.1	0.646261	7.61339e-50	postive
BRAF	NEAT1	0.560004	3.21355e-35	postive
ATRX	NEAT1	0.525703	1.64061e-30	postive
BRAF	FLNB-AS1	0.614639	5.89367e-44	postive
ATRX	FLNB-AS1	0.544285	5.39381e-33	postive
TSC1	GABPB1-AS1	0.553672	2.61482e-34	postive
BRAF	GABPB1-AS1	0.656006	8.37813e-52	postive
ATRX	GABPB1-AS1	0.613885	7.99477e-44	postive
BRAF	AC004492.1	0.784521	1.06157e-86	postive
ATRX	AC004492.1	0.686115	2.42657e-58	postive
BRAF	Z98884.2	0.546082	3.0444e-33	postive
ATRX	Z98884.2	0.507574	3.12103e-28	postive
TSC1	LINC00852	0.574899	1.93426e-37	postive
BRAF	LINC00852	0.715056	2.01686e-65	postive
ATRX	LINC00852	0.548749	1.29398e-33	postive
CD40	AC004687.1	0.54009	2.02301e-32	postive
ATRX	ATP1B3-AS1	0.525543	1.72083e-30	postive
TSC1	AC010834.3	0.560826	2.43984e-35	postive
MAPK8	AC010834.3	0.523974	2.74364e-30	postive
BRAF	AC010834.3	0.769298	2.10512e-81	postive
ATRX	AC010834.3	0.730159	1.76862e-69	postive
MLKL	IRF1-AS1	0.502032	1.4594e-27	postive
ZBP1	IRF1-AS1	0.503491	9.75052e-28	postive
CFLAR	IRF1-AS1	0.612492	1.40057e-43	postive
BRAF	AC099343.3	0.612268	1.53219e-43	postive
BRAF	AC022400.1	0.52049	7.66389e-30	postive
TSC1	WARS2-AS1	0.520164	8.43382e-30	postive
BRAF	WARS2-AS1	0.51585	2.95635e-29	postive
BRAF	AC073046.1	0.589113	1.14577e-39	postive
KLF9	MAGI2-AS3	0.533544	1.53464e-31	postive
ZBP1	U62317.4	0.686786	1.69877e-58	postive
BRAF	AC005674.2	0.504657	7.05286e-28	postive
MLKL	HCP5	0.538852	2.97757e-32	postive
BRAF	AL031667.3	0.560553	2.67375e-35	postive
BRAF	MCM3AP-AS1	0.61806	1.46421e-44	postive
ATRX	MCM3AP-AS1	0.595306	1.13184e-40	postive
BRAF	AL353804.1	0.602688	6.70498e-42	postive
ATRX	AL353804.1	0.706074	3.93072e-63	postive
BRAF	AC011477.2	0.526713	1.21342e-30	postive
TSC1	AC092279.1	0.500765	2.06854e-27	postive
BRAF	AC092279.1	0.811198	4.14014e-97	postive
ATRX	AC092279.1	0.543292	7.38725e-33	postive
TRIM11	AL139288.1	0.837511	3.83558e-109	postive
OTULIN	AL139407.1	0.507286	3.38394e-28	postive
BRAF	AL139407.1	0.816702	1.82725e-99	postive
ATRX	AL139407.1	0.595988	8.7435e-41	postive
GATA3	AL390294.1	0.666849	4.53589e-54	postive
TSC1	AL354993.2	0.506502	4.21436e-28	postive
BRAF	AL354993.2	0.75189	7.98465e-76	postive
ATRX	AL354993.2	0.575331	1.66131e-37	postive
MLKL	USP30-AS1	0.563913	8.61336e-36	postive
ZBP1	USP30-AS1	0.504839	6.70466e-28	postive
BRAF	AC006001.2	0.732377	4.25072e-70	postive
BRAF	SDCBP2-AS1	0.580808	2.36497e-38	postive
ATRX	SDCBP2-AS1	0.656666	6.13582e-52	postive
MAP3K7	AC005393.1	0.584318	6.64901e-39	postive
BRAF	AL035071.1	0.531271	3.06918e-31	postive
ATRX	AP003392.1	0.624988	8.27124e-46	postive
MYC	EMSLR	0.626172	5.02334e-46	postive
TSC1	HM13-IT1	0.539871	2.16659e-32	postive
TSC1	AC015849.3	0.503751	9.07221e-28	postive
BRAF	AC015849.3	0.516696	2.31473e-29	postive
ATRX	AC015849.3	0.653825	2.33113e-51	postive
TSC1	FMR1-IT1	0.536874	5.50384e-32	postive
BRAF	FMR1-IT1	0.612197	1.57655e-43	postive
ATRX	FMR1-IT1	0.621641	3.34409e-45	postive
BRAF	AC009318.2	0.781241	1.59739e-85	postive
BRAF	AC002553.2	0.679448	7.94662e-57	postive
ATRX	AC002553.2	0.596059	8.51232e-41	postive
BRAF	AC139100.2	0.541754	1.20019e-32	postive
BRAF	MUC20-OT1	0.53619	6.80042e-32	postive
TSC1	AF117829.1	0.508867	2.16836e-28	postive
BRAF	AF117829.1	0.648603	2.6141e-50	postive
ATRX	AF117829.1	0.538812	3.01566e-32	postive
BRAF	AC253576.2	0.683903	7.80283e-58	postive
BRAF	AC012181.1	0.557476	7.46339e-35	postive
ATRX	AC012181.1	0.564272	7.62679e-36	postive
BRAF	SNHG14	0.652968	3.47834e-51	postive
BRAF	HCG18	0.550838	6.58662e-34	postive
ATRX	HCG18	0.582391	1.33728e-38	postive
IDH1	ERVE-1	0.512232	8.34916e-29	postive
ATRX	AL157932.1	0.520744	7.11431e-30	postive
BRAF	AC245884.8	0.534199	1.2554e-31	postive
BRAF	N4BP2L2-IT2	0.794561	1.95181e-90	postive
ATRX	N4BP2L2-IT2	0.617079	2.18667e-44	postive
BRAF	TRHDE-AS1	0.723175	1.43594e-67	postive
BRAF	AC080013.1	0.550932	6.38933e-34	postive
TSC1	AL354733.3	0.656793	5.77724e-52	postive
IPMK	AC108449.2	0.518087	1.54596e-29	postive
OTULIN	AC108449.2	0.506947	3.72107e-28	postive
BRAF	AC108449.2	0.72028	8.54486e-67	postive
ATRX	AC108449.2	0.777316	3.85255e-84	postive
TSC1	KDM4A-AS1	0.579858	3.32501e-38	postive
BRAF	KDM4A-AS1	0.678323	1.41917e-56	postive
BRAF	AL078581.2	0.595771	9.49228e-41	postive
ATRX	AL078581.2	0.580305	2.83318e-38	postive
BRAF	AC004596.1	0.524389	2.42584e-30	postive
TSC1	AC024361.1	0.53264	2.02307e-31	postive
BRAF	AC024361.1	0.682166	1.93849e-57	postive
BRAF	AL049840.2	0.535678	7.96638e-32	postive
ATRX	AL049840.2	0.722399	2.32143e-67	postive
LEF1	AL158166.1	0.51785	1.65609e-29	postive
TSC1	AC006435.2	0.516786	2.25539e-29	postive
BRAF	FIRRE	0.620528	5.30256e-45	postive
ATRX	FIRRE	0.512474	7.79066e-29	postive
BRAF	LINC00641	0.553796	2.51127e-34	postive
ATRX	LINC00641	0.623093	1.82775e-45	postive
BRAF	AL683813.2	0.604034	3.97408e-42	postive
ATRX	AL683813.2	0.534485	1.15001e-31	postive
KLF9	MBNL1-AS1	0.528706	6.66946e-31	postive
BRAF	AC002044.1	0.689516	3.94645e-59	postive
IDH1	AL135999.3	0.530221	4.22105e-31	postive
BRAF	AC024560.3	0.551293	5.68209e-34	postive
BRAF	CR936218.1	0.68837	7.29799e-59	postive
ATRX	CR936218.1	0.701386	5.69537e-62	postive
TNFRSF1B	CARD8-AS1	0.51141	1.05527e-28	postive
BRAF	AL606489.1	0.669629	1.14855e-54	postive
DDX58	U62317.1	0.596678	6.73024e-41	postive
BRAF	AL031670.1	0.530863	3.47404e-31	postive
ATRX	AL031670.1	0.64086	8.63844e-49	postive
ATRX	PAXIP1-AS2	0.549407	1.04685e-33	postive
BRAF	AC110792.3	0.722798	1.81375e-67	postive
ATRX	AC110792.3	0.536259	6.65828e-32	postive
TSC1	AC008735.4	0.531495	2.86745e-31	postive
ATRX	AC037198.1	0.520582	7.46123e-30	postive
BRAF	AL021578.1	0.584021	7.4082e-39	postive
BRAF	AL645608.1	0.5564	1.06566e-34	postive
CD40	MIR155HG	0.617325	1.97744e-44	postive
BCL2L11	MIR155HG	0.520849	6.89797e-30	postive
TSC1	AC012360.3	0.521588	5.55259e-30	postive
BRAF	MCCC1-AS1	0.582044	1.51533e-38	postive
TSC1	AC060780.1	0.604417	3.42258e-42	postive
BRAF	AC060780.1	0.554286	2.13853e-34	postive
ATRX	AC060780.1	0.555862	1.27275e-34	postive
CD40	ITGB2-AS1	0.531793	2.61867e-31	postive
TSC1	AC024075.3	0.541863	1.15955e-32	postive
BRAF	AC024075.3	0.618767	1.09522e-44	postive
ATRX	AC024075.3	0.634933	1.17487e-47	postive
BRAF	AC104695.4	0.619235	9.03613e-45	postive
ATRX	AC104695.4	0.506402	4.33491e-28	postive
TSC1	AC096586.2	0.568417	1.84818e-36	postive
BRAF	AC096586.2	0.685453	3.44448e-58	postive
ATRX	AC096586.2	0.630538	7.84975e-47	postive
DNMT1	AC099850.4	0.569036	1.493e-36	postive
PLK1	AC099850.4	0.624193	1.15441e-45	postive
SIRT3	AC132192.2	0.507597	3.10085e-28	postive
BRAF	AC090739.1	0.758078	9.40782e-78	postive
ATRX	AC090739.1	0.658488	2.58543e-52	postive
BRAF	AC104695.2	0.505845	5.06534e-28	postive
BRAF	Z83843.1	0.66867	1.84751e-54	postive
ATRX	Z83843.1	0.660025	1.2414e-52	postive
BRAF	AC018690.1	0.524502	2.34564e-30	postive
BRAF	AC020913.3	0.612548	1.3693e-43	postive
ATRX	AC020913.3	0.681693	2.47966e-57	postive
ATRX	AC087276.2	0.56346	1.00435e-35	postive
BRAF	SOS1-IT1	0.570884	7.87416e-37	postive
ATRX	SOS1-IT1	0.509627	1.74977e-28	postive
BRAF	CBR3-AS1	0.620196	6.08223e-45	postive
GATA3	AC004982.2	0.508529	2.38545e-28	postive
KLF9	AC093010.2	0.503051	1.10135e-27	postive
BRAF	AC253536.6	0.556098	1.17736e-34	postive
BRAF	LINC01376	0.627762	2.56433e-46	postive
BRAF	LINC02820	0.538974	2.86678e-32	postive
BRAF	AC083843.3	0.617136	2.13614e-44	postive
BRAF	AL590723.1	0.609561	4.51599e-43	postive
ATRX	AL590723.1	0.547897	1.70245e-33	postive
BRAF	AC025171.2	0.552672	3.62658e-34	postive
TSC1	AC109460.2	0.543947	6.00365e-33	postive
TSC1	CCDC18-AS1	0.537004	5.28816e-32	postive
BRAF	CCDC18-AS1	0.532597	2.0494e-31	postive
BRAF	LINC01876	0.809016	3.38483e-96	postive
ATRX	LINC01876	0.52461	2.27165e-30	postive
BRAF	ZNF433-AS1	0.545542	3.61631e-33	postive
BRAF	AC104041.1	0.659754	1.41352e-52	postive
BRAF	AC012181.2	0.543973	5.9549e-33	postive
ATRX	AC012181.2	0.591542	4.64969e-40	postive
TNFRSF1B	AL133371.2	0.588199	1.60562e-39	postive
TSC1	AC024075.1	0.500089	2.48981e-27	postive
ATRX	AC024075.1	0.665209	1.01294e-53	postive
TSC1	AC007566.1	0.52153	5.64791e-30	postive
BRAF	AC007566.1	0.539498	2.43402e-32	postive
TSC1	AL021878.2	0.507395	3.28115e-28	postive
BRAF	AL021878.2	0.625405	6.93947e-46	postive
ATRX	AL021878.2	0.509183	1.98353e-28	postive
BRAF	EP300-AS1	0.617032	2.22854e-44	postive
ATRX	EP300-AS1	0.549852	9.06453e-34	postive
BRAF	AP002907.1	0.5547	1.86623e-34	postive
ATRX	AP002907.1	0.546118	3.0097e-33	postive
AXL	AL596244.1	0.607062	1.2138e-42	postive
BRAF	AL157838.1	0.726282	2.06513e-68	postive
ATRX	AL157838.1	0.616915	2.33735e-44	postive
BRAF	AC025175.1	0.545331	3.86768e-33	postive
BRAF	AC002128.2	0.678014	1.66324e-56	postive
ATRX	AC002128.2	0.536948	5.37936e-32	postive
BRAF	AL139260.1	0.511049	1.16918e-28	postive
BRAF	AP001628.1	0.817819	5.94597e-100	postive
ATRX	AP001628.1	0.53357	1.5221e-31	postive
ATRX	SNHG4	0.528456	7.19005e-31	postive
BRAF	AC004908.2	0.52112	6.37189e-30	postive
BRAF	AL731567.1	0.500131	2.46137e-27	postive
TSC1	ZKSCAN2-DT	0.502515	1.27707e-27	postive
MAP3K7	AC008537.2	0.645137	1.26692e-49	postive
TSC1	INE1	0.510708	1.28797e-28	postive
ATRX	AC253536.3	0.500474	2.24045e-27	postive
BRAF	AC084824.5	0.599109	2.66354e-41	postive
BRAF	AC009022.1	0.566835	3.18242e-36	postive
BRAF	AL121839.2	0.665441	9.0425e-54	postive
BRAF	AL391834.1	0.63185	4.46619e-47	postive
AXL	GAS6-DT	0.592454	3.30687e-40	postive
BRAF	AC004477.3	0.533581	1.51744e-31	postive
TSC1	PPP1R26-AS1	0.509901	1.61915e-28	postive
BRAF	UBL7-AS1	0.512205	8.41262e-29	postive
TSC1	AC009120.3	0.571553	6.24198e-37	postive
BRAF	AC009120.3	0.590404	7.09994e-40	postive
ATRX	AC009120.3	0.684661	5.23499e-58	postive
BRAF	AC121764.1	0.607343	1.08619e-42	postive
ATRX	AC121764.1	0.527742	8.9134e-31	postive
BRAF	AC026369.1	0.718452	2.60492e-66	postive
BRAF	AL109614.1	0.69361	4.28495e-60	postive
ATRX	AL109614.1	0.555739	1.32567e-34	postive
BRAF	AP005899.1	0.576769	9.99417e-38	postive
ATRX	AP005899.1	0.63943	1.63043e-48	postive
BRAF	AC007255.1	0.569443	1.29753e-36	postive
BRAF	Z82243.1	0.510217	1.48065e-28	postive
ATRX	Z82243.1	0.634815	1.23722e-47	postive
BRAF	AC009318.3	0.775667	1.43904e-83	postive
ATRX	AC009318.3	0.503652	9.32337e-28	postive
BRAF	AC008115.3	0.502807	1.17821e-27	postive
ATRX	AC008115.3	0.62409	1.20498e-45	postive
TSC1	AC135050.5	0.555436	1.46501e-34	postive
BRAF	AC135050.5	0.635194	1.04866e-47	postive
ATRX	AC135050.5	0.668713	1.80907e-54	postive
BRAF	AP000692.1	0.630564	7.76148e-47	postive
ATRX	AP000692.1	0.588688	1.34078e-39	postive
MLKL	LINC01871	0.52292	3.74823e-30	postive
BRAF	AC018638.7	0.625504	6.65752e-46	postive
MAP3K7	AL133338.1	0.608487	6.91319e-43	postive
ID1	TMEM51-AS1	0.506815	3.8613e-28	postive
BRAF	AL049840.7	0.571107	7.28881e-37	postive
ATRX	AL049840.7	0.628501	1.87291e-46	postive
BRAF	AC090181.2	0.719867	1.10024e-66	postive
ATRX	AC090181.2	0.572369	4.69667e-37	postive
BRAF	AC010615.2	0.519652	9.79572e-30	postive
OTULIN	SCARNA9	0.506101	4.71481e-28	postive
BRAF	SCARNA9	0.726794	1.49676e-68	postive
ATRX	SCARNA9	0.690152	2.80135e-59	postive
TSC1	AL157392.3	0.611891	1.78193e-43	postive
BRAF	AL157392.3	0.733903	1.58131e-70	postive
ATRX	AL157392.3	0.584598	6.00648e-39	postive
ATRX	AC007406.5	0.573308	3.38229e-37	postive
BRAF	AC005670.3	0.50762	3.08075e-28	postive
ATRX	AC005670.3	0.512393	7.97377e-29	postive
BRAF	LINC02038	0.541673	1.231e-32	postive
IDH1	LINC02038	0.52727	1.02701e-30	postive
BNIP3	MEG3	0.534942	9.9933e-32	postive
BRAF	AC011503.2	0.600275	1.70259e-41	postive
TSC1	AC090198.1	0.510199	1.48817e-28	postive
BRAF	AC090198.1	0.781011	1.92753e-85	postive
ATRX	AC090198.1	0.605684	2.0854e-42	postive
ZBP1	LINC02446	0.514451	4.42271e-29	postive
BRAF	LINC02163	0.621374	3.73665e-45	postive
OTULIN	AC004943.2	0.500201	2.41474e-27	postive
KLF9	MIR100HG	0.577713	7.14981e-38	postive
BRAF	AC009318.4	0.659562	1.54964e-52	postive
BRAF	AL136531.1	0.5221	4.77461e-30	postive
ATRX	TMEM9B-AS1	0.505441	5.66894e-28	postive
BRAF	AC020978.4	0.587118	2.39016e-39	postive
ATRX	AC137932.1	0.622441	2.39868e-45	postive
MLKL	PSMB8-AS1	0.529967	4.55835e-31	postive
TERT	AC026740.1	0.544174	5.58644e-33	postive
TRAF2	AL441992.2	0.546844	2.38569e-33	postive
BRAF	MALAT1	0.696068	1.11039e-60	postive
ATRX	MALAT1	0.597568	4.79864e-41	postive
BRAF	AC025287.3	0.638541	2.41561e-48	postive
ATRX	AC025287.3	0.555237	1.56405e-34	postive
BRAF	TMEM161B-AS1	0.513593	5.65802e-29	postive
OTULIN	AC022150.4	0.533039	1.79057e-31	postive
BRAF	AC022150.4	0.843617	3.02868e-112	postive
ATRX	AC022150.4	0.591291	5.10612e-40	postive
BRAF	AC021078.1	0.685832	2.81965e-58	postive
ATRX	AC021078.1	0.633177	2.51898e-47	postive
TNFRSF1B	SMIM25	0.596255	7.90146e-41	postive
TSC1	ANKRD10-IT1	0.574467	2.252e-37	postive
ATRX	ANKRD10-IT1	0.586538	2.95642e-39	postive
TSC1	AC108010.1	0.548591	1.36157e-33	postive
IPMK	AC108010.1	0.503755	9.06237e-28	postive
BRAF	AC108010.1	0.802353	1.75538e-93	postive
ATRX	AC108010.1	0.774076	5.07728e-83	postive
GATA3	GATA3-AS1	0.72892	3.89761e-69	postive
TSC1	AC139795.2	0.514059	4.94992e-29	postive
ATRX	AC139795.2	0.514853	3.94061e-29	postive
TSC1	GHRLOS	0.551122	6.00608e-34	postive
BRAF	GHRLOS	0.618762	1.09753e-44	postive
BRAF	C5orf17	0.651199	7.90999e-51	postive
BRAF	AC011472.4	0.53497	9.90499e-32	postive
TRIM11	AC044893.1	0.501375	1.74907e-27	postive
SIRT1	AC005586.1	0.549488	1.01965e-33	postive
BRAF	MIR29B2CHG	0.607442	1.04486e-42	postive
BRAF	AL359715.3	0.807828	1.05019e-95	postive
OTULIN	AC010186.3	0.534782	1.04945e-31	postive
BRAF	AC010186.3	0.739691	3.48765e-72	postive
ATRX	AC010186.3	0.608907	5.85515e-43	postive
TNFRSF1B	LINC01094	0.587988	1.73542e-39	postive
BRAF	AC074032.1	0.569677	1.19636e-36	postive
BRAF	AC007998.4	0.54575	3.38431e-33	postive
BRAF	AL031716.1	0.563653	9.40809e-36	postive
BRAF	AC007128.1	0.713488	5.13813e-65	postive
KLF9	PCAT19	0.610764	2.79694e-43	postive
TSC1	AP006621.2	0.576188	1.2278e-37	postive
BRAF	AP006621.2	0.540391	1.84091e-32	postive
TSC1	AC139887.2	0.591411	4.88203e-40	postive
BRAF	AC139887.2	0.744386	1.46592e-73	postive
ATRX	AC139887.2	0.679002	1.00044e-56	postive
BRAF	SCHLAP1	0.631647	4.87534e-47	postive
TSC1	FBXL19-AS1	0.516129	2.7273e-29	postive
GATA3	MCF2L-AS1	0.546415	2.73661e-33	postive
BRAF	AC090579.1	0.750648	1.91603e-75	postive
BRAF	AC022211.2	0.537219	4.94691e-32	postive
ATRX	AC022211.2	0.54612	3.00724e-33	postive
BRAF	FAM160A1-DT	0.642481	4.18818e-49	postive
ATRX	FAM160A1-DT	0.555544	1.41372e-34	postive
TSC1	AL132989.1	0.590562	6.69736e-40	postive
BRAF	AL132989.1	0.607613	9.76791e-43	postive
ATRX	AL132989.1	0.698405	3.03499e-61	postive
ATRX	DLEU2	0.525453	1.76786e-30	postive
ATRX	AC138207.4	0.552604	3.70833e-34	postive
BRAF	AC090246.1	0.508503	2.40314e-28	postive
LEF1	SCGB1B2P	0.500866	2.01185e-27	postive
TSC1	AC011477.1	0.520431	7.79872e-30	postive
BRAF	AC011477.1	0.731621	6.92064e-70	postive
ATRX	AC011477.1	0.532794	1.92973e-31	postive
TSC1	MIR600HG	0.706962	2.35593e-63	postive
BRAF	MIR600HG	0.540557	1.74805e-32	postive
TSC1	AC005253.1	0.540267	1.91407e-32	postive
BRAF	AC005253.1	0.535145	9.38574e-32	postive
ATRX	AC005253.1	0.576532	1.08704e-37	postive
TSC1	AC073957.3	0.5739	2.74793e-37	postive
BRAF	AC073957.3	0.644258	1.88513e-49	postive
TSC1	AC139887.1	0.53384	1.40159e-31	postive
BRAF	AC139887.1	0.695117	1.87559e-60	postive
ATRX	AC139887.1	0.604445	3.38578e-42	postive
BRAF	FAM13A-AS1	0.654307	1.86123e-51	postive
ATRX	FAM13A-AS1	0.582727	1.18429e-38	postive
BRAF	NUTM2B-AS1	0.748377	9.37608e-75	postive
ATRX	NUTM2B-AS1	0.559323	4.03544e-35	postive
TSC1	AC097376.3	0.546828	2.39785e-33	postive
BRAF	AC097376.3	0.779313	7.68866e-85	postive
ATRX	AC097376.3	0.595708	9.72045e-41	postive
TSC1	AC018521.6	0.509083	2.04021e-28	postive
BRAF	AC018521.6	0.685934	2.67043e-58	postive
ATRX	AC018521.6	0.545786	3.34521e-33	postive
BRAF	LINC-PINT	0.523041	3.61653e-30	postive
ATRX	LINC-PINT	0.60311	5.69379e-42	postive
BRAF	AL591848.4	0.726616	1.67417e-68	postive
ATRX	AL591848.4	0.505671	5.31681e-28	postive
TSC1	MIR3936HG	0.544994	4.30582e-33	postive
BRAF	MIR3936HG	0.581743	1.68918e-38	postive
BRAF	AC002553.1	0.571482	6.39785e-37	postive
ATRX	AC002553.1	0.553125	3.12757e-34	postive
BRAF	AC008014.1	0.583437	9.1553e-39	postive
TSC1	LINC02615	0.504284	7.82352e-28	postive
BRAF	LINC02615	0.562353	1.45973e-35	postive
BRAF	NUTM2A-AS1	0.652867	3.64671e-51	postive
TSC1	AP001625.2	0.538003	3.87877e-32	postive
BRAF	AP001625.2	0.717656	4.21823e-66	postive
ATRX	AP001625.2	0.512282	8.23146e-29	postive
