# Supplementary material for: A Necroptosis-Related lncRNA to Develop a Signature to Predict the Outcome, Immune Landscape, and Chemotherapeutic Responses in Bladder Urothelial Carcinoma
Source: Front Oncol. 2022 Jun 24;12:928204. doi: 10.3389/fonc.2022.928204 (PMC9270023; doi:10.3389/fonc.2022.928204)
Supplement: Supplementary Table 4 — The sum of 89 differentially necroptosis-related lncRNAs in BLCA. [file Table_4.xlsx]

## Sheet: Sheet1
LncRNAs	Control-mean	Tumor-mean	logFC	P-value	FDR
LINC01355	0.545476	1.62891	1.57832	3.09184e-06	3.58373e-05
AP002761.1	0.122172	0.526175	2.10663	7.40001e-05	0.000393125
AC073534.2	0.213701	0.71679	1.74596	0.00317071	0.00808531
AC127024.4	0.432238	1.0548	1.28707	0.000581647	0.00218117
AC006270.1	0.0964553	0.81551	3.07977	6.13123e-05	0.000332652
NDUFB2-AS1	0.432174	1.01537	1.23231	5.42294e-08	1.5365e-06
LINC00885	1.68167	4.26611	1.34302	0.00118986	0.00388993
LINC02178	0.886027	2.73838	1.6279	0.0129049	0.025709
AP003071.4	3.19256	0.531008	-2.58791	7.40325e-11	9.43915e-09
AC145423.3	0.308634	0.746654	1.27454	2.81851e-05	0.00017968
NARF-IT1	0.225835	0.5274	1.22363	0.00135342	0.0041581
PSPC1-AS2	0.507544	1.28646	1.3418	2.21e-05	0.000152311
ZNF436-AS1	0.998006	2.11222	1.08164	0.00118201	0.00388993
AL591806.1	0.0735697	0.56772	2.948	2.62715e-05	0.000171775
ZNF32-AS2	0.387687	0.845754	1.12534	0.000435418	0.00182628
MAP3K5-AS1	0.242659	0.580224	1.25768	0.00289934	0.00770138
AC132807.2	0.245776	1.51545	2.62433	0.00347019	0.0087582
AC097641.2	0.236738	0.787352	1.73372	1.03509e-07	2.39952e-06
AL136084.3	1.71813	0.552122	-1.63778	9.90754e-06	8.7118e-05
AC073046.1	0.952664	2.386	1.32455	0.00313127	0.00806539
MAGI2-AS3	2.06135	0.556842	-1.88825	2.53403e-09	1.29236e-07
AL031667.3	0.292675	0.594634	1.0227	0.00187847	0.00532234
MCM3AP-AS1	0.232226	0.515735	1.1511	2.81949e-06	3.42367e-05
AL353804.1	1.44833	0.593178	-1.28785	1.57931e-06	2.11961e-05
AC011477.2	0.95625	2.2075	1.20695	0.000751687	0.00266205
AC092279.1	0.633863	1.39482	1.13783	0.00662528	0.0144397
AL139288.1	0.897151	3.48289	1.95686	2.20996e-05	0.000152311
AL354993.2	0.269162	0.577494	1.10133	0.00471107	0.0109211
EMSLR	0.463652	2.42537	2.38709	0.00233081	0.00639093
AC015849.3	0.872397	1.7916	1.03819	0.0105844	0.0212522
FMR1-IT1	0.270235	0.548533	1.02136	0.0130327	0.0257623
AC139100.2	0.448433	0.937646	1.06415	0.0229594	0.0412299
AC253576.2	0.315645	0.785907	1.31605	0.00279362	0.00749867
SNHG14	1.47297	0.668385	-1.13998	3.48381e-06	3.70154e-05
AC245884.8	0.383714	1.08396	1.49821	2.1366e-05	0.000152311
N4BP2L2-IT2	0.232366	0.567998	1.28949	4.05408e-05	0.000234953
KDM4A-AS1	0.315019	0.822106	1.38388	1.02868e-06	1.73662e-05
AC024361.1	0.336508	0.704368	1.06569	0.00122182	0.00389456
AL158166.1	0.166637	1.20245	2.85119	3.60311e-07	7.06764e-06
FIRRE	0.0664667	1.00803	3.92277	2.00809e-09	1.28016e-07
LINC00641	3.40846	0.98107	-1.79669	7.84712e-08	2.00102e-06
MBNL1-AS1	8.04424	0.642751	-3.64562	5.71594e-09	2.42927e-07
AC024560.3	0.256837	0.691163	1.42817	6.27207e-06	5.92362e-05
U62317.1	0.574413	3.97656	2.79136	3.10106e-05	0.000192871
AL645608.1	0.196133	0.629804	1.68307	0.000444247	0.00182628
AC012360.3	0.317799	0.710906	1.16155	1.30656e-06	1.85096e-05
MCCC1-AS1	0.481633	1.0048	1.0609	0.00127137	0.00400245
AC099850.4	1.91887	9.17799	2.25792	2.4482e-08	8.91843e-07
AC132192.2	0.523033	1.14271	1.12748	2.48623e-05	0.000166839
AC004982.2	0.590631	1.38617	1.23077	0.00163024	0.00489071
AC093010.2	14.5522	4.93027	-1.5615	8.50146e-10	7.22624e-08
AC253536.6	0.429025	1.01734	1.24567	0.00120579	0.0038921
LINC02820	0.430293	1.84796	2.10254	0.000283716	0.00129192
AC109460.2	0.396935	0.970455	1.28976	0.000451198	0.00182628
LINC01876	0.232602	0.662185	1.50937	0.0169608	0.0315694
AP002907.1	0.263495	0.572763	1.12017	0.00492889	0.0113231
AL157838.1	0.189276	0.673051	1.83023	4.22329e-05	0.00023932
AP001628.1	0.44731	1.50704	1.75237	0.000262052	0.00123747
SNHG4	0.653956	1.63142	1.31887	9.32437e-05	0.000485248
AL731567.1	1.07481	3.11637	1.53579	0.00180745	0.0052375
ZKSCAN2-DT	0.351778	0.909635	1.37062	4.57837e-06	4.66993e-05
AC009022.1	0.576446	1.37578	1.25499	4.8501e-05	0.000268864
GAS6-DT	2.04025	0.521564	-1.96783	1.72783e-05	0.000133514
AP005899.1	0.294139	0.593694	1.01322	0.00456412	0.0106788
AC008115.3	0.378138	0.994001	1.39433	0.00016934	0.000839891
AP000692.1	0.389731	0.79564	1.02964	0.0104698	0.0211889
AC010615.2	0.194504	0.732835	1.91369	0.000762076	0.00266205
MEG3	3.35741	1.52677	-1.13687	5.97375e-07	1.08808e-05
AC011503.2	0.290537	1.45242	2.32166	3.77198e-08	1.20232e-06
LINC02163	0.158834	0.93407	2.55601	3.52051e-05	0.000208775
AC004943.2	0.439308	0.933008	1.08665	1.38236e-05	0.00011371
MIR100HG	7.42149	1.15654	-2.68189	4.03536e-11	9.43915e-09
AL136531.1	0.445726	0.955248	1.09972	0.000641269	0.00230315
AC026740.1	0.70418	1.80894	1.36113	3.43945e-05	0.000208775
AL441992.2	1.94635	4.31737	1.14938	1.51962e-05	0.000121095
GATA3-AS1	2.4137	6.197	1.36032	0.021411	0.0389987
GHRLOS	0.249253	0.797302	1.67752	1.31256e-05	0.000111568
AC011472.4	2.47587	0.711911	-1.79817	2.41265e-07	5.12689e-06
AC010186.3	0.942208	1.92483	1.03062	0.000873595	0.00297022
AC007128.1	0.0996112	0.667209	2.74376	2.05331e-06	2.61797e-05
AP006621.2	0.563093	1.40084	1.31484	0.000953929	0.00320068
DLEU2	0.505319	1.20978	1.25948	1.24576e-06	1.85096e-05
AC138207.4	0.363648	0.875783	1.26803	1.81856e-05	0.000136392
AC090246.1	0.246955	0.662237	1.4231	0.000219399	0.0010556
AC073957.3	0.328445	0.854195	1.37891	0.000534702	0.00203506
AC139887.1	0.319782	0.766867	1.26189	0.00169451	0.00502442
AC018521.6	2.50353	0.932669	-1.42452	1.08965e-06	1.73662e-05
LINC02615	0.482988	0.975593	1.01429	0.0150487	0.0292932
AP001625.2	0.281977	0.685825	1.28226	0.0103688	0.0211523
