# Supplementary material for: A Necroptosis-Related lncRNA to Develop a Signature to Predict the Outcome, Immune Landscape, and Chemotherapeutic Responses in Bladder Urothelial Carcinoma
Source: Front Oncol. 2022 Jun 24;12:928204. doi: 10.3389/fonc.2022.928204 (PMC9270023; doi:10.3389/fonc.2022.928204)
Supplement: Supplementary Table 6 — Univariate Cox regression analysis of necroptosis-related lncRNA pairs significantly influencing outcomes in BLCA. [file Table_6.xlsx]

## Sheet: Sheet1
LncRNA pairs	HR	HR.95L	HR.95H	P-value
LINC01355|NDUFB2-AS1	0.63031	0.455016	0.873135	0.00550483
LINC01355|LINC02178	0.563197	0.396337	0.800305	0.00136209
LINC01355|AL136084.3	0.558778	0.391518	0.797492	0.00134243
LINC01355|EMSLR	0.573037	0.417627	0.786278	0.000561426
LINC01355|AL731567.1	1.54801	1.12572	2.1287	0.00717453
LINC01355|MIR100HG	0.651024	0.471606	0.8987	0.00907365
LINC01355|AL136531.1	0.50886	0.362361	0.714586	9.62564e-05
LINC01355|AC018521.6	0.617967	0.445665	0.856885	0.00390068
AP002761.1|AC024361.1	1.64948	1.19955	2.26815	0.00207283
AP002761.1|AC139887.1	1.55256	1.13096	2.13134	0.00650405
AC073534.2|LINC02178	0.639542	0.46573	0.878221	0.00573635
AC073534.2|AL136084.3	0.655052	0.476513	0.900487	0.00917227
AC073534.2|MAGI2-AS3	0.60389	0.437954	0.832697	0.00209182
AC073534.2|AL354993.2	0.608246	0.438829	0.84307	0.00283773
AC073534.2|EMSLR	0.589898	0.421646	0.825289	0.00206453
AC073534.2|SNHG14	0.643575	0.462525	0.895494	0.00892618
AC073534.2|AL158166.1	0.606294	0.425228	0.864461	0.00569778
AC073534.2|LINC00641	0.526354	0.342398	0.809142	0.00344155
AC073534.2|MBNL1-AS1	0.566136	0.408185	0.785206	0.000652473
AC073534.2|AC024560.3	0.508006	0.34722	0.743247	0.000486152
AC073534.2|GAS6-DT	0.521708	0.380217	0.715853	5.5563e-05
AC073534.2|AP005899.1	0.623601	0.452762	0.858901	0.00383838
AC073534.2|MEG3	0.625785	0.441679	0.886631	0.00836843
AC073534.2|MIR100HG	0.598688	0.426274	0.840837	0.0030733
AC073534.2|AL136531.1	0.54296	0.365758	0.806014	0.00244678
AC073534.2|AC018521.6	0.553846	0.36995	0.829153	0.00410521
AC127024.4|AL136084.3	0.580103	0.419189	0.802786	0.00101918
AC127024.4|AL731567.1	1.72163	1.21374	2.44205	0.00231892
AC127024.4|MIR100HG	0.620745	0.451702	0.853049	0.00328336
AC127024.4|GATA3-AS1	1.69821	1.22273	2.35859	0.00157895
AC006270.1|GAS6-DT	0.644858	0.469044	0.886571	0.00690846
AC006270.1|MIR100HG	0.595709	0.406941	0.87204	0.00771812
NDUFB2-AS1|LINC02178	0.620595	0.439587	0.876136	0.00669728
NDUFB2-AS1|AL731567.1	1.55938	1.12043	2.17029	0.00843398
NDUFB2-AS1|ZKSCAN2-DT	1.62475	1.14259	2.31039	0.00689191
NDUFB2-AS1|GATA3-AS1	1.57467	1.13846	2.17801	0.00607787
NDUFB2-AS1|GHRLOS	1.80911	1.19459	2.73975	0.00511581
LINC02178|AC145423.3	1.64491	1.17933	2.29429	0.00337285
LINC02178|NARF-IT1	1.81237	1.31364	2.50045	0.000293115
LINC02178|PSPC1-AS2	1.74466	1.24019	2.45432	0.00139258
LINC02178|ZNF32-AS2	1.79933	1.29407	2.50187	0.000477965
LINC02178|MAP3K5-AS1	1.59117	1.15547	2.19115	0.00443854
LINC02178|AC097641.2	1.64426	1.17401	2.30287	0.00381161
LINC02178|AC092279.1	1.59902	1.13713	2.24852	0.00695809
LINC02178|AC015849.3	1.62715	1.13989	2.32269	0.00734029
LINC02178|FMR1-IT1	1.6233	1.17521	2.24224	0.00328685
LINC02178|AC139100.2	1.56205	1.12213	2.17443	0.00822372
LINC02178|AC245884.8	1.61136	1.14838	2.26098	0.00577112
LINC02178|KDM4A-AS1	1.77318	1.26688	2.48182	0.000840835
LINC02178|AC024361.1	1.80657	1.30083	2.50893	0.000416316
LINC02178|AC012360.3	1.60525	1.14511	2.25031	0.00602956
LINC02178|MCCC1-AS1	1.70628	1.22545	2.37577	0.00155717
LINC02178|AC253536.6	1.60172	1.14503	2.24055	0.0059445
LINC02178|AP002907.1	1.55133	1.12452	2.14013	0.00747629
LINC02178|AP001628.1	1.57912	1.12078	2.2249	0.00900591
LINC02178|AL731567.1	1.91378	1.34305	2.72705	0.000327795
LINC02178|ZKSCAN2-DT	1.68272	1.2004	2.35885	0.00252868
LINC02178|AC009022.1	1.70834	1.1925	2.44732	0.00350176
LINC02178|AC008115.3	1.90845	1.36457	2.66909	0.000159279
LINC02178|AP000692.1	1.63073	1.17805	2.25736	0.00320214
LINC02178|GATA3-AS1	1.65246	1.17637	2.32122	0.00376982
LINC02178|GHRLOS	1.75263	1.26351	2.43109	0.000776856
LINC02178|AP006621.2	1.68052	1.18988	2.37348	0.00320993
LINC02178|AC138207.4	1.59874	1.14175	2.23862	0.00629983
LINC02178|AC073957.3	1.62585	1.1682	2.26278	0.0039547
LINC02178|AC139887.1	1.54661	1.11303	2.1491	0.00937777
LINC02178|LINC02615	1.65091	1.18872	2.29282	0.00277565
LINC02178|AP001625.2	1.64192	1.19167	2.2623	0.00242722
AC145423.3|AL136084.3	0.636948	0.461525	0.879048	0.00606432
AC145423.3|GATA3-AS1	1.60303	1.15274	2.22922	0.00503472
NARF-IT1|AL136084.3	0.527409	0.383508	0.725304	8.29823e-05
NARF-IT1|MAGI2-AS3	0.624127	0.452348	0.86114	0.00410198
NARF-IT1|GAS6-DT	0.604265	0.439781	0.830267	0.00188764
NARF-IT1|AC004943.2	0.531401	0.344044	0.820786	0.00436754
PSPC1-AS2|AL136084.3	0.457611	0.32422	0.645882	8.73724e-06
PSPC1-AS2|EMSLR	0.637572	0.464304	0.8755	0.00540741
PSPC1-AS2|LINC00641	0.61968	0.449721	0.853871	0.0034357
PSPC1-AS2|MBNL1-AS1	0.601965	0.420805	0.861115	0.00546061
PSPC1-AS2|AC018521.6	0.600491	0.436957	0.825227	0.00166506
ZNF436-AS1|AC092279.1	0.599992	0.424697	0.847641	0.00376076
ZNF436-AS1|EMSLR	0.615814	0.448262	0.845995	0.00277021
ZNF436-AS1|AC004943.2	0.63862	0.45579	0.894787	0.00916103
ZNF32-AS2|AL136084.3	0.503797	0.365796	0.693861	2.69487e-05
ZNF32-AS2|AC004943.2	0.537964	0.385394	0.750935	0.000269262
ZNF32-AS2|MIR100HG	0.600292	0.435563	0.827321	0.0018196
ZNF32-AS2|AC018521.6	0.611541	0.440626	0.848752	0.00327667
MAP3K5-AS1|GAS6-DT	0.619312	0.450884	0.850656	0.00308868
MAP3K5-AS1|AC004943.2	0.562852	0.366223	0.865052	0.00876539
MAP3K5-AS1|MIR100HG	0.639691	0.45624	0.896908	0.00957147
AC097641.2|AL136084.3	0.548685	0.396594	0.759101	0.00028993
AC097641.2|AC018521.6	0.533773	0.380536	0.748717	0.000276752
AL136084.3|AL031667.3	1.80683	1.31543	2.4818	0.000259311
AL136084.3|MCM3AP-AS1	1.62023	1.17945	2.22573	0.0028942
AL136084.3|AL353804.1	1.59104	1.15722	2.18748	0.00425102
AL136084.3|AC092279.1	1.63788	1.16658	2.29957	0.00437273
AL136084.3|AC015849.3	1.63422	1.13599	2.35096	0.00811658
AL136084.3|FMR1-IT1	1.58732	1.15525	2.18098	0.00436865
AL136084.3|AC139100.2	1.64686	1.19706	2.26568	0.00217615
AL136084.3|AC253576.2	2.032	1.47847	2.79278	1.24375e-05
AL136084.3|AC245884.8	2.14721	1.55786	2.95953	3.04263e-06
AL136084.3|N4BP2L2-IT2	1.62132	1.18017	2.22738	0.00286058
AL136084.3|KDM4A-AS1	1.94391	1.4049	2.68972	6.02389e-05
AL136084.3|AC024361.1	1.75504	1.27581	2.41428	0.000546294
AL136084.3|AC024560.3	1.55066	1.12169	2.14369	0.00793115
AL136084.3|AC012360.3	1.80387	1.3032	2.49689	0.000375855
AL136084.3|MCCC1-AS1	1.70369	1.23354	2.35304	0.00122104
AL136084.3|AC132192.2	1.88703	1.35114	2.63547	0.000194797
AL136084.3|AC004982.2	1.78828	1.26188	2.53426	0.00108476
AL136084.3|AC253536.6	1.86381	1.35247	2.56848	0.000141658
AL136084.3|AC109460.2	1.75166	1.26581	2.42399	0.000719338
AL136084.3|LINC01876	1.56172	1.13606	2.14686	0.0060387
AL136084.3|AP002907.1	1.80368	1.31197	2.47968	0.000281301
AL136084.3|AL157838.1	1.53167	1.11547	2.10317	0.00840391
AL136084.3|SNHG4	1.62518	1.13545	2.32614	0.00794797
AL136084.3|AL731567.1	1.79423	1.23481	2.60709	0.00216735
AL136084.3|ZKSCAN2-DT	1.59974	1.15439	2.21691	0.00476618
AL136084.3|AC009022.1	1.7232	1.2023	2.46979	0.00304521
AL136084.3|AC008115.3	2.27407	1.63929	3.15466	8.66986e-07
AL136084.3|AC011503.2	1.92148	1.33438	2.76691	0.000447271
AL136084.3|AL136531.1	1.60685	1.15578	2.23397	0.00478588
AL136084.3|AC026740.1	1.82327	1.28787	2.58123	0.000708334
AL136084.3|GATA3-AS1	1.63825	1.17018	2.29356	0.00403516
AL136084.3|GHRLOS	1.54226	1.12236	2.11926	0.00754362
AL136084.3|AP006621.2	1.66403	1.17122	2.3642	0.00448303
AL136084.3|AC138207.4	1.83731	1.31995	2.55745	0.000311997
AL136084.3|AC090246.1	1.53514	1.11632	2.1111	0.00836589
AL136084.3|AC073957.3	1.72106	1.25196	2.36594	0.000826072
AL136084.3|AC139887.1	1.53831	1.11675	2.11901	0.0083948
AL136084.3|LINC02615	1.81951	1.32192	2.50439	0.000240536
AL136084.3|AP001625.2	1.74367	1.26725	2.39919	0.00063896
AC073046.1|EMSLR	0.652826	0.475671	0.895958	0.00828783
MAGI2-AS3|MCM3AP-AS1	1.53456	1.11774	2.10683	0.00808939
MAGI2-AS3|AC245884.8	1.68718	1.21391	2.34496	0.00184543
MAGI2-AS3|KDM4A-AS1	1.53421	1.11119	2.11828	0.00930842
MAGI2-AS3|AC132192.2	1.68056	1.19573	2.36197	0.00279611
MAGI2-AS3|AL731567.1	1.68083	1.14884	2.45916	0.00748098
AL031667.3|MIR100HG	0.59616	0.431121	0.82438	0.00176128
AL031667.3|AL136531.1	0.603668	0.415514	0.877023	0.00808398
MCM3AP-AS1|AC245884.8	1.79516	1.2676	2.54231	0.00098231
MCM3AP-AS1|GATA3-AS1	1.58333	1.12973	2.21906	0.0076253
AC011477.2|MIR100HG	0.635196	0.460779	0.875634	0.00559148
AC011477.2|AL136531.1	0.561066	0.39843	0.790089	0.000936279
AC092279.1|GATA3-AS1	1.65303	1.19218	2.29205	0.00257748
AC092279.1|AC010186.3	1.59042	1.13509	2.22841	0.00701223
AL139288.1|EMSLR	0.626653	0.456322	0.860563	0.00387867
AL354993.2|AC245884.8	1.62416	1.16442	2.26542	0.00428318
AL354993.2|MCCC1-AS1	1.63473	1.17671	2.27102	0.00338872
AL354993.2|GATA3-AS1	1.65521	1.16587	2.34994	0.00482853
EMSLR|AC245884.8	1.73541	1.25994	2.39031	0.00073969
EMSLR|AC132192.2	1.55504	1.13143	2.13725	0.0065084
EMSLR|AC253536.6	1.53762	1.11185	2.12643	0.00929695
EMSLR|AL731567.1	1.53415	1.11782	2.10554	0.00806086
EMSLR|ZKSCAN2-DT	1.66336	1.20635	2.29349	0.00190562
EMSLR|AC009022.1	1.57503	1.14782	2.16124	0.00489365
EMSLR|GATA3-AS1	1.6466	1.19776	2.26364	0.0021315
EMSLR|AP006621.2	1.61282	1.17087	2.22157	0.00343939
EMSLR|LINC02615	1.54701	1.12065	2.13558	0.00799123
AC015849.3|AL731567.1	1.71656	1.24845	2.36018	0.000881433
AC015849.3|AC018521.6	0.620349	0.446719	0.861466	0.00437091
AC253576.2|LINC00641	0.59484	0.420662	0.841137	0.0032966
AC253576.2|AC024560.3	0.597729	0.432984	0.825158	0.00175913
AC253576.2|GAS6-DT	0.636378	0.461917	0.876729	0.00569727
AC253576.2|AC004943.2	0.542079	0.379298	0.774719	0.000776636
AC253576.2|MIR100HG	0.621611	0.448158	0.862196	0.00439643
AC253576.2|AL136531.1	0.588607	0.414407	0.836033	0.00307409
AC253576.2|AC018521.6	0.513248	0.357754	0.736327	0.000292168
SNHG14|GATA3-AS1	1.60448	1.13207	2.27402	0.00788185
AC245884.8|N4BP2L2-IT2	0.585783	0.408393	0.840224	0.00366239
AC245884.8|KDM4A-AS1	0.644155	0.46779	0.887012	0.00704937
AC245884.8|AC024361.1	0.630256	0.453589	0.875731	0.00594791
AC245884.8|MBNL1-AS1	0.572936	0.41091	0.798849	0.00102273
AC245884.8|AC024560.3	0.593869	0.431746	0.81687	0.00135787
AC245884.8|AP002907.1	0.618888	0.437961	0.87456	0.00653471
AC245884.8|MIR100HG	0.614499	0.447767	0.843316	0.00256847
AC245884.8|AC007128.1	0.647162	0.468861	0.893269	0.00813651
AC245884.8|AC138207.4	0.62469	0.454564	0.858487	0.00372394
AC245884.8|AC018521.6	0.581213	0.422132	0.800244	0.000882009
N4BP2L2-IT2|AC004943.2	0.574617	0.386442	0.854422	0.00619575
N4BP2L2-IT2|MIR100HG	0.595384	0.422194	0.839618	0.00310952
N4BP2L2-IT2|GATA3-AS1	1.6312	1.1567	2.30034	0.00527084
KDM4A-AS1|AL731567.1	1.67786	1.18458	2.37654	0.00357248
KDM4A-AS1|MIR100HG	0.614015	0.446325	0.844708	0.0027269
KDM4A-AS1|GATA3-AS1	1.62443	1.17055	2.2543	0.0037094
AC024361.1|GAS6-DT	0.637954	0.46099	0.88285	0.00669512
AC024361.1|MIR100HG	0.607302	0.439581	0.839017	0.00249149
AL158166.1|GAS6-DT	0.550767	0.398097	0.761987	0.000316764
LINC00641|AC253536.6	1.56778	1.11793	2.19865	0.00915918
LINC00641|AL731567.1	1.97714	1.42039	2.75212	5.35173e-05
LINC00641|GHRLOS	1.59252	1.12177	2.26083	0.00924992
MBNL1-AS1|AP002907.1	1.60428	1.16516	2.20889	0.00377069
MBNL1-AS1|AL731567.1	1.82995	1.2516	2.67554	0.00182131
AC024560.3|MCCC1-AS1	1.53068	1.11457	2.10215	0.00853693
AC024560.3|AC004982.2	1.5442	1.11377	2.14097	0.00915283
AC024560.3|AC253536.6	1.52114	1.10795	2.08843	0.0094897
AC024560.3|AL731567.1	1.77996	1.24353	2.54779	0.00162647
AC024560.3|ZKSCAN2-DT	1.57744	1.1484	2.16677	0.00488831
AC024560.3|AC011503.2	1.68287	1.19585	2.36821	0.00282574
AC024560.3|LINC02615	1.59384	1.15881	2.19218	0.00415316
AL645608.1|GAS6-DT	0.646712	0.470976	0.88802	0.00705932
AL645608.1|MIR100HG	0.614274	0.437471	0.862532	0.00489477
AC012360.3|MIR100HG	0.614281	0.446063	0.845938	0.00283823
MCCC1-AS1|GAS6-DT	0.637246	0.454021	0.894413	0.00918489
MCCC1-AS1|AC004943.2	0.62592	0.452969	0.864906	0.00451761
MCCC1-AS1|MIR100HG	0.65238	0.474534	0.896878	0.00853486
MCCC1-AS1|GATA3-AS1	1.60432	1.14296	2.25192	0.00628857
AC132192.2|MEG3	0.605283	0.440387	0.831921	0.00197484
AC132192.2|MIR100HG	0.569478	0.41495	0.781552	0.000490338
AC132192.2|AC138207.4	0.612654	0.446216	0.841172	0.00245074
AC132192.2|AC018521.6	0.575406	0.41924	0.789744	0.000623686
AC253536.6|AC004943.2	0.584456	0.414544	0.82401	0.00218066
AC253536.6|MIR100HG	0.641631	0.466821	0.881902	0.00624971
AC253536.6|AC018521.6	0.583275	0.414878	0.820024	0.00192526
AC109460.2|GATA3-AS1	1.71844	1.24156	2.37847	0.00109599
LINC01876|GAS6-DT	0.61	0.444158	0.837766	0.00226213
AP002907.1|GAS6-DT	0.533003	0.38809	0.732027	0.000101549
AP002907.1|AC004943.2	0.531297	0.351403	0.803284	0.00271298
AL157838.1|AP001628.1	1.57799	1.13165	2.20039	0.00716647
AP001628.1|GATA3-AS1	1.63744	1.17648	2.279	0.00346127
SNHG4|AL731567.1	1.55902	1.132	2.14712	0.00654395
SNHG4|GATA3-AS1	1.66312	1.20676	2.29204	0.0018811
AL731567.1|AC008115.3	0.602464	0.431815	0.840553	0.00286183
AL731567.1|MIR100HG	0.600168	0.434785	0.828458	0.00190809
AL731567.1|DLEU2	0.649181	0.469763	0.897123	0.00885155
AL731567.1|AC018521.6	0.569766	0.409119	0.793494	0.000872469
ZKSCAN2-DT|MIR100HG	0.610029	0.443528	0.839034	0.00237254
ZKSCAN2-DT|AL136531.1	0.638972	0.462995	0.881835	0.00642934
ZKSCAN2-DT|AC007128.1	0.589952	0.426886	0.815308	0.00138877
ZKSCAN2-DT|AC018521.6	0.638965	0.459836	0.887872	0.00761903
AC009022.1|AC004943.2	0.650035	0.471857	0.895494	0.00840654
AC009022.1|AL136531.1	0.640839	0.463363	0.886289	0.00715412
AC009022.1|AC018521.6	0.626518	0.455365	0.862	0.00407702
GAS6-DT|GHRLOS	1.60323	1.157	2.22154	0.0045648
GAS6-DT|AC090246.1	1.5669	1.13694	2.15944	0.00606564
GAS6-DT|AP001625.2	1.61154	1.17424	2.21168	0.00313226
AC008115.3|GATA3-AS1	1.67139	1.20906	2.31051	0.00187674
AP000692.1|MIR100HG	0.638106	0.462615	0.880169	0.00618445
AP000692.1|GATA3-AS1	1.62772	1.16073	2.28258	0.00474353
AC010615.2|MIR100HG	0.639484	0.460969	0.887131	0.00742702
AC010615.2|GATA3-AS1	1.59321	1.12202	2.26229	0.00922696
MEG3|GATA3-AS1	1.56497	1.13484	2.15813	0.00630608
MEG3|LINC02615	1.55091	1.12332	2.14127	0.00766324
AC011503.2|MIR100HG	0.608766	0.442104	0.838256	0.00235821
AC004943.2|AC010186.3	1.81484	1.26902	2.59544	0.00109398
AC004943.2|AP006621.2	1.67094	1.21659	2.29496	0.00151975
AC004943.2|AC073957.3	1.7301	1.22046	2.45256	0.00207724
AC004943.2|AC139887.1	1.82487	1.2671	2.62817	0.00122958
MIR100HG|AC011472.4	1.58205	1.12124	2.23223	0.00901592
MIR100HG|AP006621.2	1.56931	1.14286	2.15487	0.00534725
MIR100HG|AC138207.4	1.55892	1.1346	2.14192	0.00616278
MIR100HG|LINC02615	1.61815	1.17753	2.22363	0.00300091
AC026740.1|GATA3-AS1	1.54767	1.12591	2.12741	0.00713372
AL441992.2|GATA3-AS1	1.57701	1.14378	2.17434	0.00544041
GATA3-AS1|AC011472.4	0.616741	0.437723	0.868972	0.00573061
GATA3-AS1|AC007128.1	0.599681	0.423124	0.849912	0.00405383
GATA3-AS1|AC090246.1	0.602128	0.429281	0.844571	0.00329821
GATA3-AS1|AC139887.1	0.635912	0.453857	0.890995	0.00852183
GATA3-AS1|AC018521.6	0.617119	0.446095	0.853709	0.00355472
GHRLOS|AC018521.6	0.593884	0.415957	0.84792	0.00413149
AC073957.3|AC018521.6	0.634048	0.453063	0.887331	0.0078826
AC139887.1|AC018521.6	0.586852	0.409483	0.841049	0.00369922
