# Supplementary material for: A Necroptosis-Related lncRNA to Develop a Signature to Predict the Outcome, Immune Landscape, and Chemotherapeutic Responses in Bladder Urothelial Carcinoma
Source: Front Oncol. 2022 Jun 24;12:928204. doi: 10.3389/fonc.2022.928204 (PMC9270023; doi:10.3389/fonc.2022.928204)
Supplement: Supplementary Table 7 — The association between risk score and tumor-infiltrating immune cells. [file Table_7.xlsx]

## Sheet: corResult
symbol	type	correlation	p value
T cell CD4+	TIMER	0.0984362	0.0494297
T cell CD8+	TIMER	0.345951	1.16563e-12
Neutrophil	TIMER	0.282929	8.83484e-09
Macrophage	TIMER	0.340749	2.64237e-12
Myeloid dendritic cell	TIMER	0.328982	1.59161e-11
B cell naive	CIBERSORT	0.10683	0.0328961
T cell CD8+	CIBERSORT	-0.170061	0.000646798
T cell CD4+ naive	CIBERSORT	-0.114959	0.0216352
T cell follicular helper	CIBERSORT	-0.261543	1.15505e-07
T cell regulatory (Tregs)	CIBERSORT	-0.142282	0.00440417
Macrophage M0	CIBERSORT	0.241328	1.0734e-06
Macrophage M1	CIBERSORT	0.208279	2.74812e-05
Macrophage M2	CIBERSORT	0.188113	0.000157109
Myeloid dendritic cell activated	CIBERSORT	-0.194384	9.30763e-05
Mast cell resting	CIBERSORT	0.118247	0.0181341
Neutrophil	CIBERSORT	0.136936	0.00615075
B cell naive	CIBERSORT-ABS	0.147297	0.00318665
B cell plasma	CIBERSORT-ABS	0.0994529	0.0471153
T cell CD4+ naive	CIBERSORT-ABS	-0.10909	0.0293506
T cell CD4+ memory resting	CIBERSORT-ABS	0.179361	0.000317325
T cell CD4+ memory activated	CIBERSORT-ABS	0.0983229	0.0496933
NK cell activated	CIBERSORT-ABS	0.14785	0.00307313
Macrophage M0	CIBERSORT-ABS	0.271286	3.68102e-08
Macrophage M1	CIBERSORT-ABS	0.240757	1.14006e-06
Macrophage M2	CIBERSORT-ABS	0.300077	9.5501e-10
Myeloid dendritic cell activated	CIBERSORT-ABS	-0.101547	0.0426339
Mast cell resting	CIBERSORT-ABS	0.172402	0.000542466
Neutrophil	CIBERSORT-ABS	0.154951	0.00190795
B cell	QUANTISEQ	0.172237	0.000549301
Macrophage M1	QUANTISEQ	0.259014	1.54277e-07
Macrophage M2	QUANTISEQ	0.205074	3.66814e-05
Monocyte	QUANTISEQ	0.11166	0.0257221
T cell CD8+	QUANTISEQ	0.114129	0.022606
T cell regulatory (Tregs)	QUANTISEQ	0.201695	4.94967e-05
uncharacterized cell	QUANTISEQ	-0.185971	0.000187161
T cell CD8+	MCPCOUNTER	0.101788	0.0421411
cytotoxicity score	MCPCOUNTER	0.20262	4.56186e-05
NK cell	MCPCOUNTER	0.158674	0.00147409
B cell	MCPCOUNTER	0.175515	0.000427838
Monocyte	MCPCOUNTER	0.288225	4.51478e-09
Macrophage/Monocyte	MCPCOUNTER	0.288225	4.51478e-09
Myeloid dendritic cell	MCPCOUNTER	0.183469	0.000229043
Endothelial cell	MCPCOUNTER	0.276508	1.9568e-08
Cancer associated fibroblast	MCPCOUNTER	0.373547	1.16879e-14
Myeloid dendritic cell activated	XCELL	0.21407	1.61255e-05
T cell CD4+ central memory	XCELL	-0.255922	2.18872e-07
T cell CD8+ naive	XCELL	-0.188378	0.000153721
T cell CD8+	XCELL	-0.193441	0.000100803
Class-switched memory B cell	XCELL	-0.147442	0.00315651
Common lymphoid progenitor	XCELL	0.106584	0.0333037
Common myeloid progenitor	XCELL	0.113983	0.022781
Myeloid dendritic cell	XCELL	0.122627	0.014244
Endothelial cell	XCELL	0.169821	0.000658508
Eosinophil	XCELL	-0.207275	3.00983e-05
Cancer associated fibroblast	XCELL	0.227486	4.43045e-06
Granulocyte-monocyte progenitor	XCELL	0.164836	0.00095012
Hematopoietic stem cell	XCELL	0.129997	0.00933402
Macrophage	XCELL	0.239326	1.32484e-06
Macrophage M1	XCELL	0.249533	4.44426e-07
Macrophage M2	XCELL	0.20234	4.6761e-05
Mast cell	XCELL	0.167039	0.000809015
Monocyte	XCELL	0.189463	0.000140557
NK cell	XCELL	-0.108736	0.0298843
T cell NK	XCELL	-0.122032	0.0147251
Plasmacytoid dendritic cell	XCELL	0.147467	0.00315142
B cell plasma	XCELL	-0.117267	0.0191213
T cell CD4+ Th2	XCELL	0.278642	1.50579e-08
immune score	XCELL	0.134951	0.00694321
stroma score	XCELL	0.22163	7.86342e-06
microenvironment score	XCELL	0.200694	5.40404e-05
B cell	EPIC	0.133236	0.00770033
Cancer associated fibroblast	EPIC	0.34028	2.84262e-12
T cell CD4+	EPIC	-0.230274	3.3533e-06
Endothelial cell	EPIC	0.169946	0.00065239
Macrophage	EPIC	0.237836	1.54761e-06
NK cell	EPIC	0.178585	0.000337194
uncharacterized cell	EPIC	-0.223439	6.59732e-06
